# Supplementary material for: EasyCodeML: A visual tool for analysis of selection using CodeML
Source: PubMed Central journal article supplement (PMC6467853; doi:10.1002/ece3.5015), 2019-03-01

Figure S1

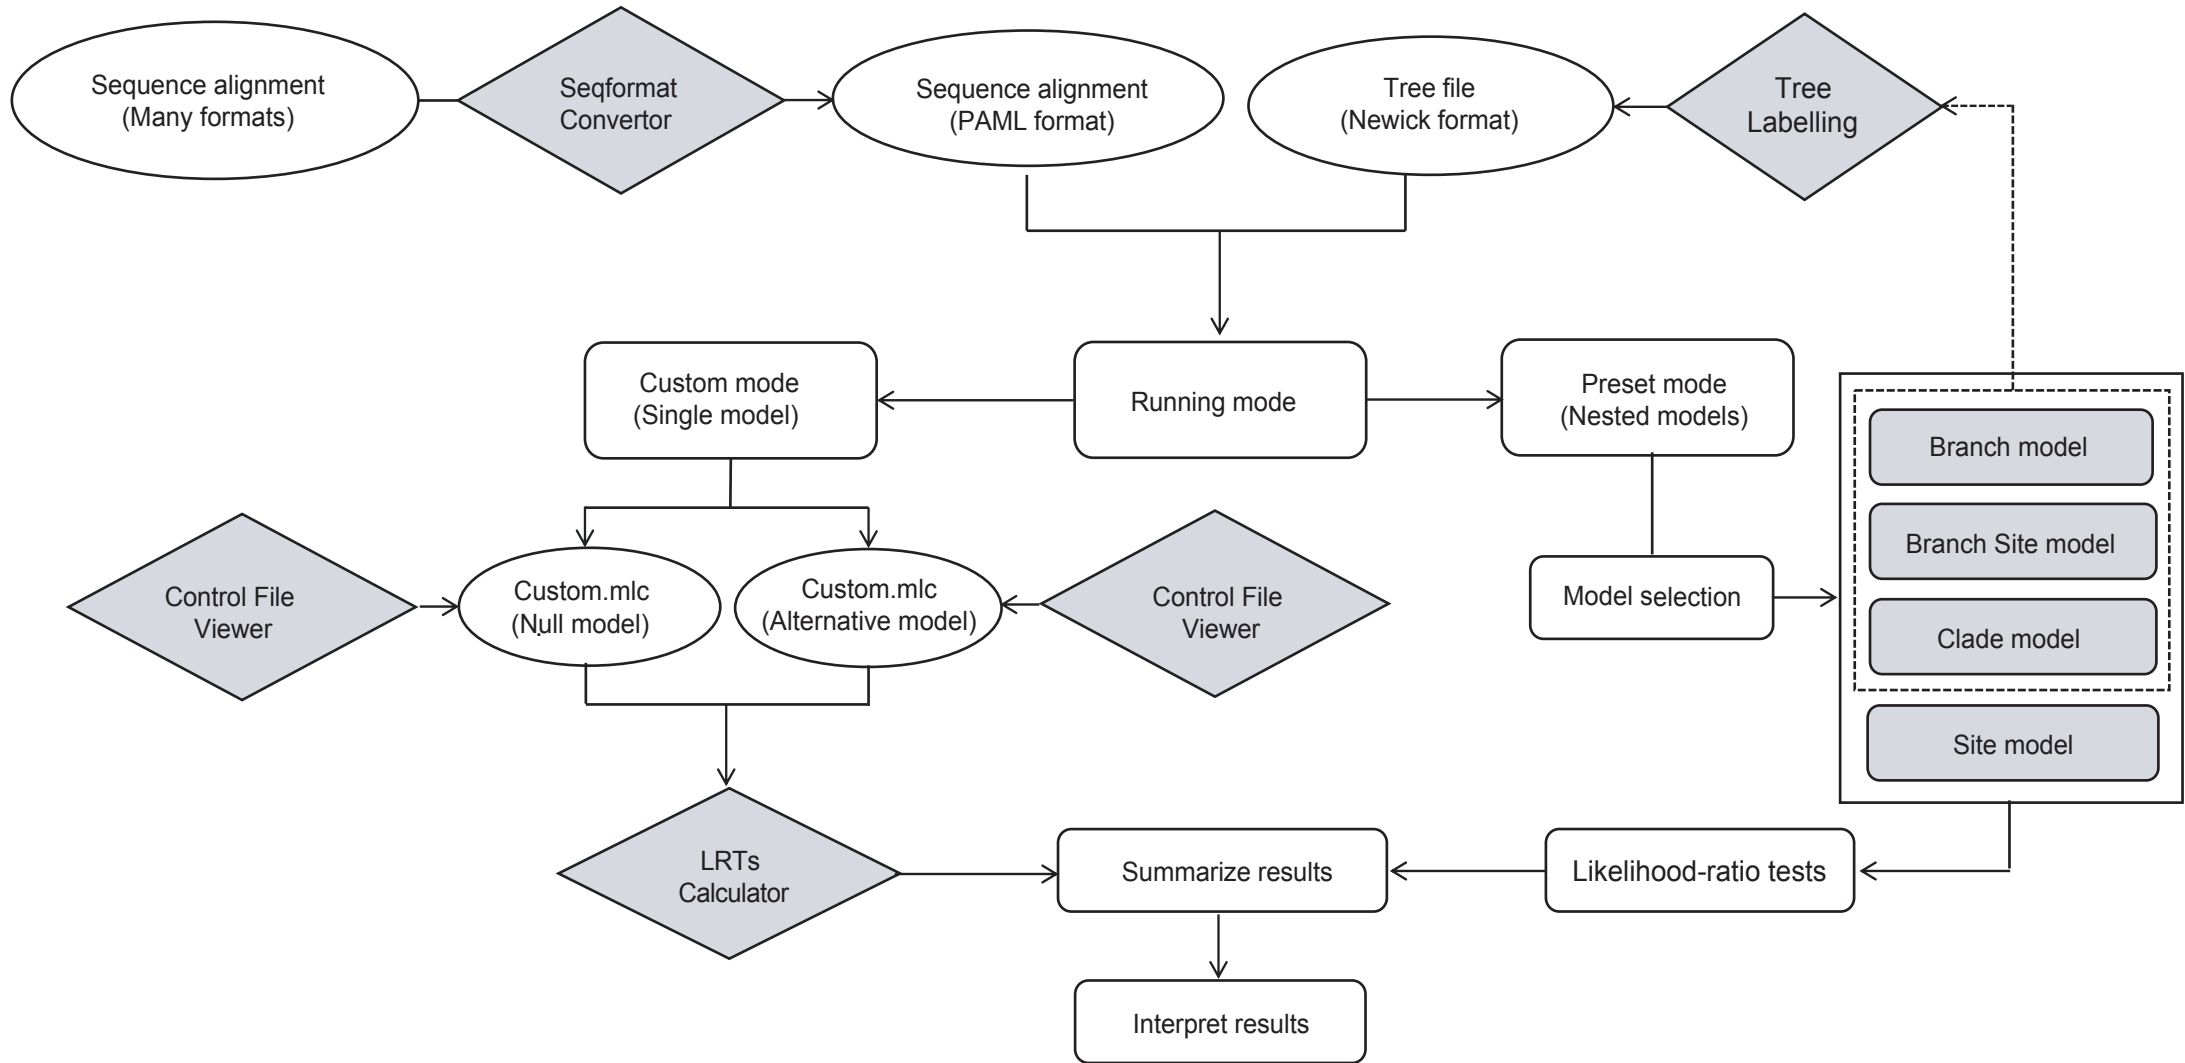

Supplement: ECE3-9-3891-s001.pdf [file ECE3-9-3891-s001.pdf]
