# Supplementary material for: EasyCodeML: A visual tool for analysis of selection using CodeML
Source: PubMed Central journal article supplement (PMC6467853; doi:10.1002/ece3.5015), 2019-03-01

Figure S2

(a).

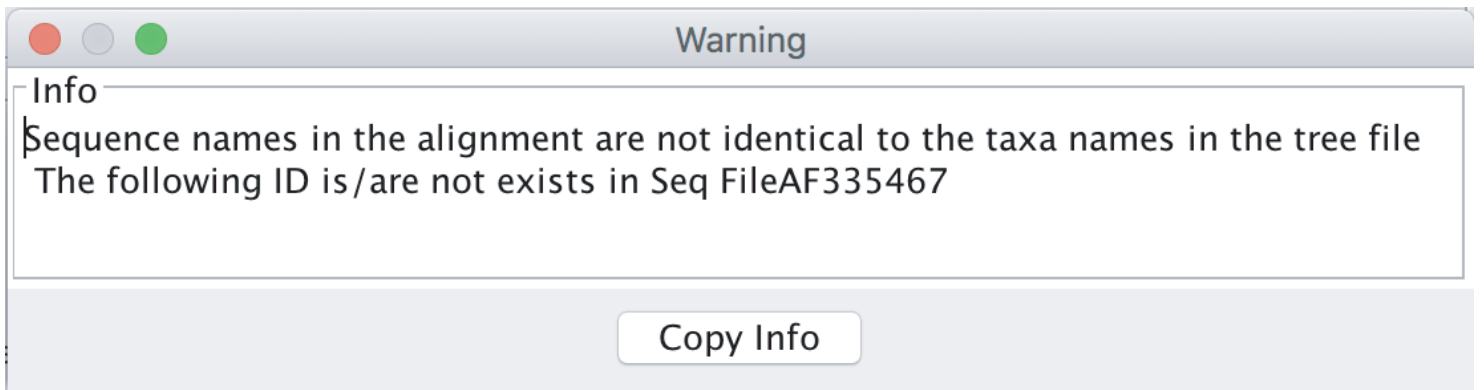

(b).

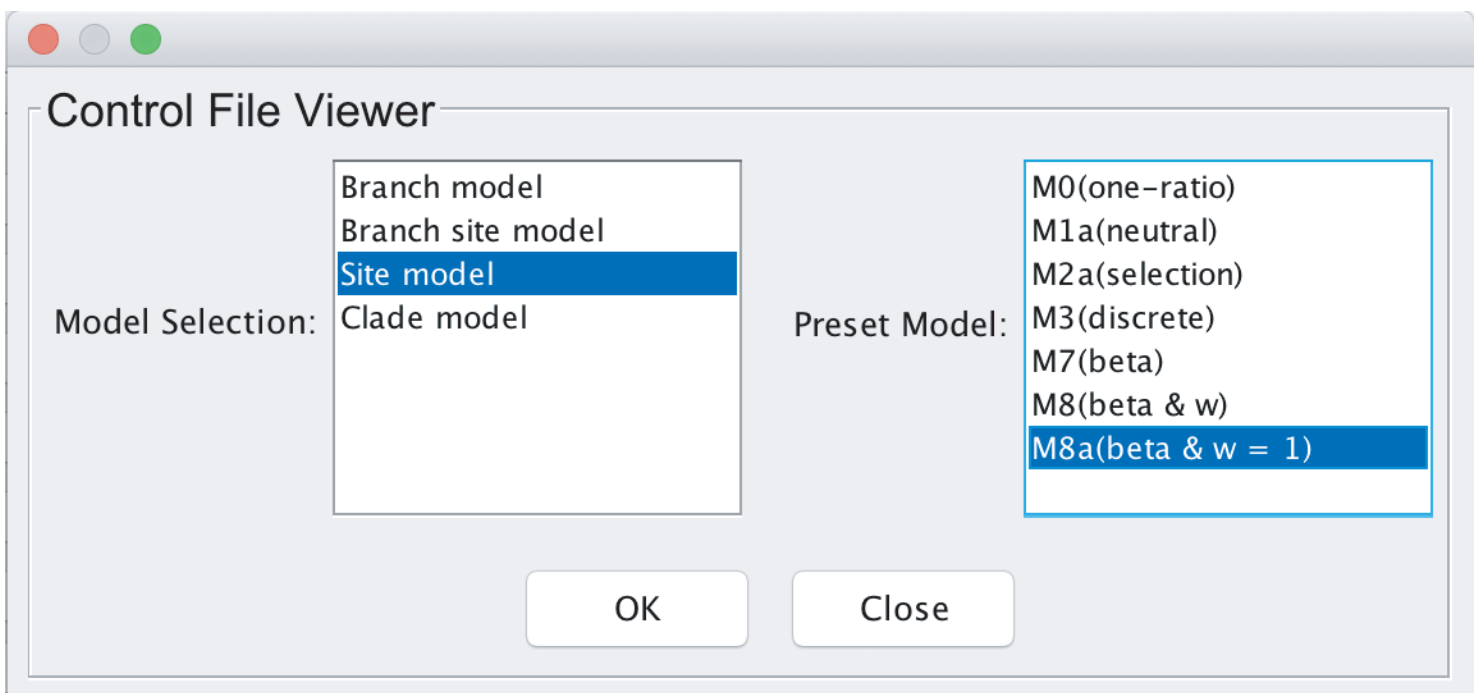

Supplement: ECE3-9-3891-s002.pdf [file ECE3-9-3891-s002.pdf]
