# Supplementary material for: EasyCodeML: A visual tool for analysis of selection using CodeML
Source: PubMed Central journal article supplement (PMC6467853; doi:10.1002/ece3.5015), 2019-03-01
Supplement: ECE3-9-3891-s003.pdf [file ECE3-9-3891-s003.pdf]

Figure S3

Bayes Empirical Bayes (BEB) analysis (Yang, Wong & Nielsen 2005. Mol. Biol. Evol. 22:1107–1118)  
Positively selected sites (\*: P>95%; \*\*: P>99%)  
(amino acids refer to 1st sequence: AF335467)

|       | Pr(w>1) | post mean +- SE for w |
|-------|---------|-----------------------|
| 14 L  | 0.603   | 5.746 +- 4.508        |
| 133 G | 0.961*  | 8.984 +- 2.082        |
| 229 S | 0.972*  | 9.080 +- 1.891        |
| 231 F | 0.996** | 9.295 +- 1.329        |
| 232 V | 0.993** | 9.264 +- 1.427        |
| 233 S | 0.566   | 5.411 +- 4.553        |
| 234 K | 0.881   | 8.272 +- 3.058        |
| 236 D | 0.953*  | 8.915 +- 2.210        |
| 237 G | 0.996** | 9.293 +- 1.334        |
| 238 G | 0.973*  | 9.091 +- 1.866        |
| 239 R | 0.999** | 9.317 +- 1.256        |
| 240 Y | 0.925   | 8.663 +- 2.596        |
| 280 N | 0.877   | 8.240 +- 3.094        |
| 355 K | 0.997** | 9.295 +- 1.326        |
