# Supplementary material for: EasyCodeML: A visual tool for analysis of selection using CodeML
Source: PubMed Central journal article supplement (PMC6467853; doi:10.1002/ece3.5015), 2019-03-01
Supplement: ECE3-9-3891-s004.pdf [file ECE3-9-3891-s004.pdf]

**TABLE S1** The control file parameters values defined for the branch models in EasyCodeML

| <b>Parameter</b> | <b>Branch model</b> |                  |                   |
|------------------|---------------------|------------------|-------------------|
|                  | <b>M0</b>           | <b>Two-ratio</b> | <b>Free ratio</b> |
| seqfile          | User                | User             | User              |
| treefile         | User                | User             | User              |
| outfile          | M0_mlc              | BM_mlc           | FM_mlc            |
| noisy            | 9                   | 9                | 9                 |
| verbose          | 0                   | 0                | 1                 |
| runmode          | 0                   | 0                | 0                 |
| seqtype          | 1                   | 1                | 1                 |
| CodonFreq        | 2                   | 2                | 2                 |
| clock            | 0                   | 0                | 0                 |
| aaDist           | 0                   | 0                | 0                 |
| model            | 0                   | 2                | 1                 |
| Nssites          | 0                   | 0                | 0                 |
| icode            | 0                   | 0                | 0                 |
| Mgene            | 0                   | 0                | 0                 |
| fix_kappa        | 0                   | 0                | 0                 |
| kappa            | 2                   | 2                | 2                 |
| fix_omega        | 0                   | 0                | 0                 |
| omega            | 2                   | 2                | 1                 |
| fix_alpha        | 1                   | 1                | 1                 |
| alpha            | 0                   | 0                | 0                 |
| Malpha           | 0                   | 0                | 0                 |
| ncatG            | 3                   | 3                | 4                 |
| getSE            | 0                   | 0                | 0                 |
| RateAncestor     | 0                   | 0                | 0                 |
| fix_blength      | 0                   | 0                | 0                 |
| method           | 0                   | 0                | 0                 |
| Small_Diff       | .45e-6              | .45e-6           | .45e-6            |
| cleandata        | 1                   | 1                | 1                 |

**TABLE S2** The control file parameters values defined for the branch-site models in EasyCodeML

| Parameter    | Branch-site model |                         |
|--------------|-------------------|-------------------------|
|              | Model A           | Model A <sub>null</sub> |
| seqfile      | User              | User                    |
| treefile     | User              | User                    |
| outfile      | A_mlc             | Anull_mlc               |
| noisy        | 9                 | 9                       |
| verbose      | 0                 | 0                       |
| runmode      | 0                 | 0                       |
| seqtype      | 1                 | 1                       |
| CodonFreq    | 2                 | 2                       |
| clock        | 0                 | 0                       |
| aaDist       | 0                 | 0                       |
| model        | 2                 | 2                       |
| Nssites      | 2                 | 2                       |
| icode        | 0                 | 0                       |
| Mgene        | 0                 | 0                       |
| fix_kappa    | 0                 | 0                       |
| kappa        | 2                 | 2                       |
| fix_omega    | 0                 | 1                       |
| omega        | 2                 | 1                       |
| fix_alpha    | 1                 | 1                       |
| alpha        | 0                 | 0                       |
| Malpha       | 0                 | 0                       |
| ncatG        | 3                 | 3                       |
| getSE        | 3                 | 0                       |
| RateAncestor | 0                 | 0                       |
| fix_blength  | 0                 | 0                       |
| method       | 0                 | 0                       |
| Small_Diff   | .45e-6            | .45e-6                  |
| cleandata    | 1                 | 1                       |

**TABLE S3** The control file parameters values defined for the site models in EasyCodeML

| Parameter    | Site model |         |         |        |        |        |         |
|--------------|------------|---------|---------|--------|--------|--------|---------|
|              | M0         | M1a     | M2a     | M3     | M7     | M8     | M8a     |
| seqfile      | User       | User    | User    | User   | User   | User   | User    |
| treefile     | User       | User    | User    | User   | User   | User   | User    |
| outfile      | M0_mlc     | M1a_mlc | M2a_mlc | M3_mlc | M7_mlc | M8_mlc | M8a_mlc |
| noisy        | 9          | 9       | 9       | 9      | 9      | 9      | 9       |
| verbose      | 0          | 0       | 0       | 0      | 0      | 0      | 0       |
| runmode      | 0          | 0       | 0       | 0      | 0      | 0      | 0       |
| seqtype      | 1          | 1       | 1       | 1      | 1      | 1      | 1       |
| CodonFreq    | 2          | 2       | 2       | 2      | 2      | 2      | 2       |
| clock        | 0          | 0       | 0       | 0      | 0      | 0      | 0       |
| aaDist       | 0          | 0       | 0       | 0      | 0      | 0      | 0       |
| model        | 0          | 0       | 0       | 0      | 0      | 0      | 0       |
| Nssites      | 0          | 1       | 2       | 3      | 7      | 8      | 8       |
| icode        | 0          | 0       | 0       | 0      | 0      | 0      | 0       |
| Mgene        | 0          | 0       | 0       | 0      | 0      | 0      | 0       |
| fix_kappa    | 0          | 0       | 0       | 0      | 0      | 0      | 0       |
| kappa        | 2          | 2       | 2       | 2      | 2      | 2      | 2       |
| fix_omega    | 0          | 0       | 0       | 0      | 0      | 0      | 1       |
| omega        | 2          | 2       | 2       | 2      | 2      | 2      | 1       |
| fix_alpha    | 1          | 1       | 1       | 1      | 1      | 1      | 1       |
| alpha        | 0          | 0       | 0       | 0      | 0      | 0      | 0       |
| Malpha       | 0          | 0       | 0       | 0      | 0      | 0      | 0       |
| ncatG        | 3          | 3       | 3       | 3      | 3      | 3      | 3       |
| getSE        | 0          | 0       | 0       | 0      | 0      | 0      | 0       |
| RateAncestor | 0          | 0       | 0       | 0      | 0      | 0      | 0       |
| fix_blength  | 0          | 0       | 0       | 0      | 0      | 0      | 0       |
| method       | 0          | 0       | 0       | 0      | 0      | 0      | 0       |
| Small_Diff   | .45e-6     | .45e-6  | .45e-6  | .45e-6 | .45e-6 | .45e-6 | .45e-6  |
| cleandata    | 1          | 1       | 1       | 1      | 1      | 1      | 1       |

**TABLE S4** The control file parameters values defined for the clade models in EasyCodeML

| Parameter    | Clade model |         |
|--------------|-------------|---------|
|              | CmC         | M2a_rel |
| seqfile      | User        | User    |
| treefile     | User        | User    |
| outfile      | CmC_mlc     | M22_mlc |
| noisy        | 9           | 9       |
| verbose      | 1           | 1       |
| runmode      | 0           | 0       |
| seqtype      | 1           | 1       |
| CodonFreq    | 2           | 2       |
| clock        | 0           | 0       |
| aaDist       | 0           | 0       |
| model        | 3           | 0       |
| Nssites      | 2           | 22      |
| icode        | 0           | 0       |
| Mgene        | 0           | 0       |
| fix_kappa    | 0           | 0       |
| kappa        | 3           | 3       |
| fix_omega    | 0           | 0       |
| omega        | 1           | 1       |
| fix_alpha    | 1           | 1       |
| alpha        | 0           | 0       |
| Malpha       | 0           | 0       |
| ncatG        | 10          | 10      |
| getSE        | 1           | 1       |
| RateAncestor | 1           | 1       |
| fix_blength  | -1          | -1      |
| method       | 0           | 0       |
| Small_Diff   | .5e-6       | .5e-6   |
| cleandata    | 1           | 1       |
